# Supplementary material for: Population-Based Long-Term Cardiac-Specific Mortality Among 34 489 Five-Year Survivors of Childhood Cancer in Great Britain
Source: PubMed Central journal article supplement (PMC5338891; doi:10.1161/circulationaha.116.024811), 2017-03-06
Supplement: cir-135-951-s001.pdf [file cir-135-951-s001.pdf]

## **SUPPLEMENTAL MATERIAL:**

Population-based long-term cardiac-specific mortality among 34,489 five-year survivors of childhood cancer in Great Britain.

Miranda M Fidler; Raoul C Reulen; Katherine Henson; Julie Kelly; David Cutter; Gill A Levitt; Clare Frobisher; David L Winter; Michael M Hawkins

On behalf of the British Childhood Cancer Survivor Study (BCCSS) Steering Group

**Acknowledgements:** The British Childhood Cancer Survivor Study (BCCSS) is a national collaborative undertaking guided by a steering group that comprises Douglas Easton (chair), Michael Hawkins, Helen Jenkinson, Meriel Jenney, Raoul Reulen, Kathryn Pritchard-Jones, Elaine Sugden, Charles Stiller, Andrew Toogood, and Hamish Wallace. The BCCSS benefits from the contributions of the officers, centres, and individual members of the Children's Cancer and Leukaemia Group and the Regional Paediatric Cancer Registries. The BCCSS acknowledges the collaboration of the Office for National Statistics, the National Records of Scotland, the Welsh Cancer Intelligence and Surveillance Unit, the Health & Social Care Information Centre, the National Cancer Intelligence Network, and Public Health England. The BCCSS would not have been possible without the support of our funders: Cancer Research UK and the European Commission to whom we offer our profound thanks. The views expressed in this publication are those of the authors and not necessarily represent those of the funders or collaborators. Finally, thanks to all BCCSS staff who have given many years of dedicated work to bring the BCCSS to fruition.

| Characteristic                     | No. Dead | %    | No. Alive | %    | P-value | Total No. | %     |
|------------------------------------|----------|------|-----------|------|---------|-----------|-------|
| <b>Overall</b>                     | 4475     | 13.0 | 30014     | 87.0 |         | 34489     | 100.0 |
| <b>Sex</b>                         |          |      |           |      |         |           |       |
| Male                               | 2629     | 13.9 | 16310     | 86.1 |         | 18939     | 100.0 |
| Female                             | 1846     | 11.9 | 13704     | 88.1 | <0.001  | 15550     | 100.0 |
| <b>First Primary Neoplasm Type</b> |          |      |           |      |         |           |       |
| CNS (excluding PNET)               | 1334     | 19.1 | 5636      | 80.9 |         | 6970      | 100.0 |
| CNS PNET                           | 340      | 28.4 | 858       | 71.6 |         | 1198      | 100.0 |
| Leukemia (excluding AML)           | 1104     | 11.6 | 8398      | 88.4 |         | 9493      | 100.0 |
| AML                                | 82       | 8.4  | 899       | 91.6 |         | 981       | 100.0 |
| Hodgkin Lymphoma                   | 331      | 14.8 | 1903      | 85.2 |         | 2234      | 100.0 |
| Non-Hodgkin Lymphoma               | 131      | 8.5  | 1418      | 91.5 |         | 1549      | 100.0 |
| Neuroblastoma                      | 144      | 9.4  | 1391      | 90.6 |         | 1535      | 100.0 |
| Non-Heritable Retinoblastoma       | 31       | 3.1  | 975       | 96.9 |         | 1006      | 100.0 |
| Heritable Retinoblastoma           | 138      | 18.4 | 612       | 81.6 |         | 750       | 100.0 |
| Wilms                              | 184      | 7.7  | 2204      | 92.3 |         | 1388      | 100.0 |
| Bone Sarcoma                       | 198      | 16.6 | 997       | 83.4 |         | 1195      | 100.0 |
| Soft Tissue Sarcoma                | 253      | 11.8 | 1894      | 88.2 |         | 2147      | 100.0 |
| Other                              | 205      | 6.7  | 2838      | 93.3 | <0.001  | 3043      | 100.0 |
| <b>Age at Diagnosis</b>            |          |      |           |      |         |           |       |
| Mean                               | 7.3      |      | 6.5       |      |         | 6.6       |       |
| 0-4                                | 1662     | 10.6 | 14035     | 89.4 |         | 15697     | 100.0 |
| 5-9                                | 1351     | 14.6 | 7913      | 85.4 |         | 9264      | 100.0 |
| 10-14                              | 1462     | 15.3 | 8066      | 84.7 | <0.001  | 9528      | 100.0 |
| <b>Treatment Era</b>               |          |      |           |      |         |           |       |
| 1940-1969                          | 1329     | 35.5 | 2417      | 64.5 |         | 3746      | 100.0 |
| 1970-1979                          | 1247     | 23.2 | 4132      | 76.8 |         | 5379      | 100.0 |
| 1980-1989                          | 942      | 13.2 | 6205      | 86.8 |         | 7147      | 100.0 |
| 1990-1999                          | 703      | 7.0  | 9328      | 93.0 |         | 10031     | 100.0 |
| 2000-2006                          | 254      | 3.1  | 7932      | 96.9 | <0.001  | 8186      | 100.0 |
| <b>Years from Diagnosis</b>        |          |      |           |      |         |           |       |
| Mean                               | 17.0     |      | 23.9      |      |         | 23.0      |       |
| 5-9 years                          | 2054     | 37.9 | 3368      | 62.2 |         | 5422      | 100.0 |
| 10-19 years                        | 1060     | 9.1  | 10561     | 90.9 |         | 11621     | 100.0 |
| 20-29 years                        | 548      | 6.9  | 7352      | 93.1 |         | 7900      | 100.0 |
| 30-39 years                        | 417      | 7.7  | 5026      | 92.3 |         | 5443      | 100.0 |
| 40-49 years                        | 277      | 9.9  | 2529      | 90.1 |         | 2806      | 100.0 |
| 50-59 years                        | 103      | 8.9  | 1052      | 91.1 |         | 1155      | 100.0 |
| 60+ years                          | 16       | 11.3 | 126       | 88.7 | <0.001  | 142       | 100.0 |
| <b>Attained Age at Exit</b>        |          |      |           |      |         |           |       |
| Mean                               | 24.3     |      | 30.4      |      |         | 29.6      |       |
| 5-9 years                          | 416      | 48.9 | 435       | 51.1 |         | 851       | 100.0 |
| 10-19 years                        | 1831     | 21.7 | 6614      | 78.3 |         | 8445      | 100.0 |
| 20-29 years                        | 1003     | 9.4  | 9730      | 90.7 |         | 10733     | 100.0 |
| 30-39 years                        | 535      | 8.1  | 6083      | 91.9 |         | 6618      | 100.0 |
| 40-49 years                        | 364      | 7.5  | 4486      | 92.5 |         | 4850      | 100.0 |
| 50-59 years                        | 238      | 11.4 | 1859      | 88.7 |         | 2097      | 100.0 |
| 60+ years                          | 88       | 9.8  | 807       | 90.2 | <0.001  | 895       | 100.0 |

**Supplemental Table 1:** Cohort characteristics of the British Childhood Cancer Survivor Study.

Abbreviations: CNS – central nervous system, PNET – primitive neuroectodermal tumor, AML – acute myeloid leukemia

| Characteristic                     | Treatment Era |      |           |      |           |      |           |      |
|------------------------------------|---------------|------|-----------|------|-----------|------|-----------|------|
|                                    | 1940-1969     |      | 1970-1979 |      | 1980-1989 |      | 1990-2006 |      |
|                                    | N             | %    | N         | %    | N         | %    | N         | %    |
| <b>Overall</b>                     | 3746          | 10.9 | 5379      | 15.6 | 7147      | 20.7 | 18217     | 52.8 |
| <b>Sex</b>                         |               |      |           |      |           |      |           |      |
| Male                               | 2019          | 53.9 | 2963      | 55.1 | 3941      | 55.1 | 10016     | 55.0 |
| Female                             | 1727          | 46.1 | 2416      | 44.9 | 3206      | 44.9 | 8201      | 45.0 |
| <b>First Primary Neoplasm Type</b> |               |      |           |      |           |      |           |      |
| CNS (excluding PNET)               | 1059          | 28.3 | 1094      | 20.3 | 1185      | 16.6 | 3632      | 19.9 |
| CNS PNET                           | 167           | 4.5  | 174       | 3.2  | 236       | 3.3  | 621       | 3.4  |
| Leukemia (excluding AML)           | 168           | 4.5  | 1554      | 28.9 | 2206      | 30.9 | 5565      | 30.6 |
| AML                                | 10            | 0.3  | 68        | 1.3  | 193       | 2.7  | 710       | 3.9  |
| Hodgkin Lymphoma                   | 297           | 7.9  | 456       | 8.5  | 495       | 6.9  | 986       | 5.4  |
| Non-Hodgkin Lymphoma               | 179           | 4.8  | 206       | 3.8  | 403       | 5.6  | 761       | 4.2  |
| Neuroblastoma                      | 217           | 5.8  | 153       | 2.8  | 307       | 4.3  | 858       | 4.7  |
| Non-Heritable Retinoblastoma       | 255           | 6.8  | 195       | 3.6  | 160       | 2.2  | 396       | 2.2  |
| Heritable Retinoblastoma           | 269           | 7.2  | 128       | 2.4  | 127       | 1.8  | 226       | 1.2  |
| Wilms                              | 324           | 8.7  | 480       | 8.9  | 515       | 7.2  | 1069      | 5.9  |
| Bone Sarcoma                       | 154           | 4.1  | 179       | 3.3  | 267       | 3.7  | 595       | 3.3  |
| Soft Tissue Sarcoma                | 310           | 8.3  | 302       | 5.6  | 453       | 6.3  | 1082      | 5.9  |
| Other                              | 337           | 9.0  | 390       | 7.3  | 600       | 8.4  | 1716      | 9.4  |
| <b>Age at Diagnosis</b>            |               |      |           |      |           |      |           |      |
| 0-4                                | 1727          | 46.1 | 2326      | 43.2 | 3317      | 46.4 | 8327      | 45.7 |
| 5-9                                | 931           | 24.9 | 1567      | 29.1 | 1864      | 26.1 | 4902      | 26.9 |
| 10-14                              | 1088          | 29.0 | 1486      | 27.6 | 1966      | 27.5 | 4988      | 27.4 |
| <b>Years from Diagnosis</b>        |               |      |           |      |           |      |           |      |
| Mean                               | 41.3          |      | 33.3      |      | 26.7      |      | 14.7      |      |
| 5-9                                | 458           | 12.2 | 524       | 9.7  | 459       | 6.4  | 3981      | 21.9 |
| 10-19                              | 214           | 5.7  | 319       | 5.9  | 338       | 4.7  | 10750     | 59.0 |
| 20-29                              | 166           | 4.4  | 243       | 4.5  | 4005      | 56.0 | 3486      | 19.1 |
| 30-39                              | 202           | 5.4  | 2896      | 53.8 | 2345      | 32.8 | 0         | 0    |
| 40-49                              | 1409          | 37.6 | 1397      | 26.0 | 0         | 0    | 0         | 0    |
| 50-59                              | 1155          | 30.8 | 0         | 0    | 0         | 0    | 0         | 0    |
| 60+                                | 142           | 3.8  | 0         | 0    | 0         | 0    | 0         | 0    |
| <b>Attained Age at Exit</b>        |               |      |           |      |           |      |           |      |
| Mean                               | 47.8          |      | 40.0      |      | 33.3      |      | 21.3      |      |
| 5-9                                | 86            | 2.3  | 105       | 2.0  | 95        | 1.3  | 565       | 3.1  |
| 10-19                              | 405           | 10.8 | 478       | 8.9  | 429       | 6.0  | 7133      | 39.2 |
| 20-29                              | 219           | 5.9  | 314       | 5.8  | 1474      | 20.6 | 8726      | 47.9 |
| 30-39                              | 193           | 5.2  | 902       | 16.8 | 3730      | 52.2 | 1793      | 9.8  |
| 40-49                              | 605           | 16.2 | 2826      | 52.5 | 1419      | 19.9 | 0         | 0    |
| 50-59                              | 1343          | 35.9 | 754       | 14.0 | 0         | 0    | 0         | 0    |
| 60+                                | 895           | 23.9 | 0         | 0    | 0         | 0    | 0         | 0    |

**Supplemental Table 2:** Cohort characteristics of the British Childhood Cancer Survivor Study by treatment era.

Abbreviations: CNS – central nervous system, PNET – primitive neuroectodermal tumor, AML – acute myeloid leukemia

| First Primary Neoplasm Type  | Attained Age (years) |      |       |      |       |      |       |      |       |      |       |      |     |      |
|------------------------------|----------------------|------|-------|------|-------|------|-------|------|-------|------|-------|------|-----|------|
|                              | 5-9                  |      | 10-19 |      | 20-29 |      | 30-39 |      | 40-49 |      | 50-59 |      | 60+ |      |
|                              | N                    | %    | N     | %    | N     | %    | N     | %    | N     | %    | N     | %    | N   | %    |
| CNS (excluding PNET)         | 159                  | 18.7 | 1553  | 18.4 | 2258  | 21.0 | 1196  | 18.1 | 977   | 20.1 | 559   | 26.7 | 268 | 29.9 |
| CNS PNET                     | 19                   | 2.2  | 371   | 4.4  | 381   | 3.6  | 193   | 2.9  | 148   | 3.1  | 62    | 3.0  | 24  | 2.3  |
| Leukemia (excluding AML)     | 285                  | 33.5 | 2987  | 35.4 | 3092  | 28.8 | 1892  | 28.6 | 1102  | 22.7 | 126   | 6.0  | 9   | 1.0  |
| AML                          | 36                   | 4.2  | 320   | 3.8  | 363   | 3.4  | 181   | 2.7  | 58    | 1.2  | 22    | 1.1  | 1   | 0.1  |
| Hodgkin Lymphoma             | 3                    | 0.4  | 248   | 2.9  | 705   | 6.6  | 471   | 7.1  | 497   | 10.3 | 228   | 10.9 | 82  | 9.2  |
| Non-Hodgkin Lymphoma         | 14                   | 1.7  | 217   | 2.6  | 457   | 4.3  | 417   | 6.3  | 255   | 5.3  | 123   | 5.9  | 66  | 7.4  |
| Neuroblastoma                | 100                  | 11.8 | 550   | 6.5  | 412   | 3.8  | 225   | 3.4  | 135   | 2.8  | 95    | 4.5  | 18  | 2.0  |
| Non-Heritable Retinoblastoma | 31                   | 3.6  | 214   | 2.5  | 230   | 2.1  | 154   | 2.3  | 201   | 4.1  | 122   | 5.8  | 54  | 6.0  |
| Heritable Retinoblastoma     | 51                   | 6.0  | 151   | 1.8  | 148   | 1.4  | 127   | 1.9  | 142   | 2.9  | 97    | 4.6  | 34  | 3.8  |
| Wilms                        | 48                   | 5.6  | 624   | 7.4  | 627   | 5.8  | 488   | 7.4  | 405   | 8.4  | 155   | 7.4  | 41  | 4.6  |
| Bone Sarcoma                 | 4                    | 0.5  | 182   | 2.2  | 365   | 3.4  | 270   | 4.1  | 203   | 4.2  | 100   | 4.8  | 71  | 7.9  |
| Soft Tissue Sarcoma          | 35                   | 4.1  | 454   | 5.4  | 676   | 6.3  | 409   | 6.2  | 306   | 6.3  | 173   | 8.3  | 94  | 10.5 |
| Other                        | 66                   | 7.8  | 574   | 6.8  | 1019  | 9.5  | 595   | 9.0  | 421   | 8.7  | 235   | 11.2 | 133 | 14.9 |

**Supplemental Table 3:** First primary neoplasm diagnoses of the British Childhood Cancer Survivor Study by attained age.

Abbreviations: CNS – central nervous system, PNET – primitive neuroectodermal tumor, AML – acute myeloid leukemia

**International Classification of Diseases (ICD) revision (calendar years of death)**

| <b>Cause of Death</b>                    | <b>ICD-5 (1940-49)</b>                           | <b>ICD-6 (1950-57)</b>                               | <b>ICD-7 (1958-67)</b>                                 | <b>ICD-8 (1968-78)</b>                          | <b>ICD-9 (1979-2000)</b>                                               | <b>ICD-10 (2001-09)</b>                                                                  |
|------------------------------------------|--------------------------------------------------|------------------------------------------------------|--------------------------------------------------------|-------------------------------------------------|------------------------------------------------------------------------|------------------------------------------------------------------------------------------|
| <b>All Cardiac</b>                       | 58a-c, 90a-b, 91a-c, 92-95, 111b-c, 199, 200a(1) | 401, 402.1, 410-416, 420-422, 430-434, 440-443       | 401, 402.1, 410-416, 420-422, 430-434, 440-443         | 391, 392.0, 393-398, 402, 404, 410-414, 420-429 | 391, 392.0, 393-398, 402, 404, 410-414, 416.1-9, 420-429               | I01, I02.0, I05-109, I11, I13, I20-125, I27.1-9, I30-I52                                 |
| <b>Cardiomyopathy/<br/>Heart Failure</b> | 58c, 93a-b, 93c(2-3), 93d, 111b-c, 200a(1)       | 401.2, 415, 422.0, 422.2, 431, 434.1-2               | 401.2, 415, 422.0, 422.2, 431, 434.1-2                 | 391.2, 422, 425, 427.0, 427.1, 428              | 391.2, 398.0, 422, 425, 428, 429.0, 429.1, 429.3                       | I01.2, I09.0, I11.0, I13.0, I13.2, I40-I43, I50, I51.4-5, I51.7                          |
| <b>Valvular Heart Disease</b>            | 92a, 92b(1), 92c                                 | 421                                                  | 421                                                    | 394.9, 395.9, 396.9, 397.0, 424                 | 424                                                                    | I34-I39                                                                                  |
| <b>Rheumatic Valvular Heart Disease</b>  | 58b, 92b(2)                                      | 401.1, 410-414                                       | 401.1, 410-414                                         | 391.1, 394.0, 395.0, 396.0, 397.9               | 391.1, 394-397                                                         | I01.1, I05-I08, I09.1                                                                    |
| <b>Ischemic Heart Disease</b>            | 93c(1), 94a, 94b                                 | 420, 422.1                                           | 420, 422.1                                             | 410-414                                         | 410-414, 429.7                                                         | I20-I25                                                                                  |
| <b>Arrhythmias</b>                       | 199                                              | 433.0-1                                              | 433.0-1                                                | 427.2-9                                         | 426-427                                                                | I44-49                                                                                   |
| <b>Pericardial Disease</b>               | 58a, 90a-b                                       | 401.0, 432                                           | 401.0, 432                                             | 391.0, 393, 420, 423                            | 391.0, 393, 420, 423                                                   | I01.0, I09.2, I30-I32                                                                    |
| <b>Other Cardiac</b>                     | 91a-c, 95                                        | 401.3, 402.1, 416, 430, 433.2, 434.0, 434.3, 440-443 | 401.3, 402.1, 416, 430, 433.2, 434.0, 434.3-4, 440-443 | 391.9, 392.0, 398, 402, 404, 421, 426, 429      | 391.8-9, 392.0, 389.9, 402, 404, 416.1-9, 421, 429.2, 429.4-6, 429.8-9 | I01.8-9, I02.0, I09.8-9, I11.9, I13.1, I13.9, I27.1-9, I33, I51.0-3, I51.6, I51.8-9, I52 |

**Supplemental Table 4:** International Classification of Diseases (ICD) categorizations and sub-categorizations for cardiac causes of death as used in the analysis.

|                                    | Overall Cardiac Mortality |                   | Ischemic Heart Disease Mortality |                     | Cardiomyopathy/Heart Failure Mortality |                  |
|------------------------------------|---------------------------|-------------------|----------------------------------|---------------------|----------------------------------------|------------------|
|                                    | RR (95%CI)                | EMR (95%CI)       | RR (95%CI)                       | EMR (95%CI)         | RR (95%CI)                             | EMR (95%CI)      |
| <b>Sex</b>                         |                           |                   |                                  |                     |                                        |                  |
| Male                               | 1 (ref)                   | 1 (ref)           | 1 (ref)                          | 1 (ref)             | 1 (ref)                                | 1 (ref)          |
| Female                             | 2.2 (1.6,3.0)             | 1.1 (0.7,1.6)     | 1.9 (1.2,3.0)                    | 0.7 (0.4,1.3)       | 3.0 (1.7,5.2)                          | 1.5 (0.8,2.9)    |
| <i>Pheterogeneity</i>              | <0.0001                   | 0.7771            | 0.0091                           | 0.2600              | 0.0002                                 | 0.2179           |
| <b>First Primary Neoplasm Type</b> |                           |                   |                                  |                     |                                        |                  |
| CNS (excluding PNET)               | 1 (ref)                   | 1 (ref)           | 1 (ref)                          | 1 (ref)             | 1 (ref)                                | 1 (ref)          |
| CNS PNET                           | 1.2 (0.5,3.2)             | 0.9 (0.2,5.4)     | 1.9 (0.6,5.5)                    | 1.7 (0.3,12.5)      | 1.7 (0.2,15.0)                         | 3.8 (0.2,61.0)   |
| Leukemia (excluding AML)           | 0.7 (0.4,1.4)             | 0.8 (0.3,1.8)     | 0.4 (0.1,1.5)                    | 0.2 (0.0,4.4)       | 1.7 (0.5,5.4)                          | 3.2 (0.4,23.6)   |
| AML                                | 5.8 (2.8,12.1)            | 7.6 (3.2,18.1)    | 1.7 (0.2,12.6)                   | 2.3 (0.2,23.5)      | 19.2 (5.7,64.8)                        | 39.8 (5.5,289.6) |
| Hodgkin Lymphoma                   | 2.7 (1.6,4.4)             | 4.0 (1.9,8.2)     | 2.4 (1.3,4.5)                    | 3.6 (1.3,9.8)       | 3.8 (1.0,13.6)                         | 4.9 (0.5,45.8)   |
| Non-Hodgkin Lymphoma               | 2.0 (1.1,3.6)             | 3.0 (1.4,6.6)     | 1.4 (0.6,3.3)                    | 2.1 (0.6,7.1)       | 5.4 (1.5,19.2)                         | 13.8 (1.8,106.1) |
| Neuroblastoma                      | 0.7 (0.2,2.1)             | 0.8 (0.2,3.0)     | 0.4 (0.1,3.2)                    | 0.5 (0.0,9.1)       | 1.2 (0.1,10.7)                         | 2.2 (0.1,38.4)   |
| Non-Heritable Retinoblastoma       | 0.2 (0.1,1.0)             | 0.1 (0.0,3.2)     | 0.5 (0.1,2.1)                    | 0.5 (0.0,5.0)       | NE                                     | NE               |
| Heritable Retinoblastoma           | 0.7 (0.2,2.0)             | 0.4 (0.0,4.7)     | 1.4 (0.4,4.5)                    | 1.5 (0.2,9.9)       | NE                                     | NE               |
| Wilms                              | 1.7 (0.9,3.1)             | 1.9 (0.8,4.3)     | 2.2 (1.0,5.1)                    | 2.8 (0.8,9.5)       | 2.5 (0.7,9.9)                          | 5.0 (0.6,41.7)   |
| Bone Sarcoma                       | 1.4 (0.6,2.9)             | 1.6 (0.5,4.9)     | 1.1 (0.4,3.0)                    | 0.9 (0.1,8.6)       | 2.6 (0.5,14.2)                         | 6.2 (0.5,71.1)   |
| Soft Tissue Sarcoma                | 1.1 (0.5,2.1)             | 1.0 (0.3,2.9)     | 1.0 (0.4,2.4)                    | 0.9 (0.2,4.5)       | 3.5 (0.9,13.2)                         | 8.0 (1.0,65.0)   |
| Other                              | 1.1 (0.6,2.1)             | 1.0 (0.4,2.8)     | 1.2 (0.6,2.6)                    | 1.2 (0.3,4.6)       | 2.1 (0.5,8.3)                          | 3.6 (0.4,36.0)   |
| <i>Pheterogeneity</i>              | <0.0001                   | <0.0001           | 0.0412                           | 0.0760              | 0.0003                                 | 0.0002           |
| <b>Age at Diagnosis</b>            |                           |                   |                                  |                     |                                        |                  |
| 0-4 years                          | 1 (ref)                   | 1 (ref)           | 1 (ref)                          | 1 (ref)             | 1 (ref)                                | 1 (ref)          |
| 5-9 years                          | 0.7 (0.5,1.1)             | 0.7 (0.4,1.2)     | 0.9 (0.5,1.8)                    | 1.0 (0.4,2.8)       | 0.7 (0.3,1.4)                          | 0.7 (0.3,1.6)    |
| 10-14 years                        | 0.5 (0.4,0.8)             | 0.5 (0.3,0.9)     | 0.8 (0.4,1.6)                    | 1.0 (0.3,2.7)       | 0.5 (0.2,1.1)                          | 0.5 (0.2,1.2)    |
| <i>Ptrend</i>                      | 0.0078                    | 0.0211            | 0.5110                           | 0.8914              | 0.0666                                 | 0.0986           |
| <b>Treatment Era</b>               |                           |                   |                                  |                     |                                        |                  |
| <1970                              | 1 (ref)                   | 1 (ref)           | 1 (ref)                          | 1 (ref)             | 1 (ref)                                | 1 (ref)          |
| 1970-1979                          | 1.6 (1.0,2.5)             | 1.3 (0.7,2.4)     | 1.5 (0.9,2.6)                    | 1.0 (0.4,2.2)       | 8.9 (2.1,37.8)                         | 13.9 (1.1,168.5) |
| 1980-1989                          | 2.3 (1.4,3.9)             | 1.8 (0.9,3.5)     | 0.8 (0.3,2.0)                    | 0.3 (0.1,1.4)       | 18.2 (3.9,84.2)                        | 28.9 (2.4,354.6) |
| 1990-2006                          | 1.0 (0.4,2.1)             | 0.6 (0.2,1.5)     | 1.0 (0.3,3.8)                    | 0.4 (0.1,2.0)       | 3.7 (0.6,23.3)                         | 4.5 (0.3,69.4)   |
| <i>Ptrend</i>                      | 0.1318                    | 0.8583            | 0.9171                           | 0.1098              | 0.1231                                 | 0.3453           |
| <i>Pquadratic</i>                  | 0.0014                    | 0.0072            | 0.2518                           | 0.6850              | <0.0001                                | <0.0001          |
| <b>Attained Age</b>                |                           |                   |                                  |                     |                                        |                  |
| 5-19 years                         | 1 (ref)                   | 1 (ref)           | 1 (ref)                          | 1 (ref)             | 1 (ref)                                | 1 (ref)          |
| 20-29 years                        | 0.8 (0.5,1.5)             | 1.9 (1.0,3.7)     | 1.3 (0.2,10.0)                   | 11.4 (1.3,102.2)    | 0.9 (0.4,2.0)                          | 1.6 (0.7,3.6)    |
| 30-39 years                        | 0.6 (0.3,1.0)             | 3.6 (1.8,7.2)     | 0.4 (0.0,3.1)                    | 19.8 (2.2,182.6)    | 1.0 (0.4,2.3)                          | 2.9 (1.2,7.2)    |
| 40-49 years                        | 0.3 (0.2,0.7)             | 5.7 (2.5,13.0)    | 0.2 (0.0,1.8)                    | 30.1 (3.0,298.5)    | 0.4 (0.1,1.4)                          | NE               |
| 50-59 years                        | 0.4 (0.2,0.8)             | 17.1 (6.6,44.7)   | 0.2 (0.0,2.0)                    | 93.2 (9.1,949.8)    | 2.2 (0.5,10.4)                         | 21.3 (3.1,147.8) |
| 60+ years                          | 0.4 (0.2,1.0)             | 45.7 (14.5,144.1) | 0.3 (0.0,2.6)                    | 267.5 (23.9,2992.9) | 2.0 (0.1,26.7)                         | NE               |
| <i>Ptrend</i>                      | 0.0065                    | <0.0001           | 0.0344                           | <0.0001             | 0.8121                                 | 0.0591           |

**Supplemental Table 5:** Relative risks and excess mortality ratios per 10,000 person-years estimated using a multivariable model, adjusting for sex, first primary neoplasm type, age at diagnosis, treatment era, and attained age.

Abbreviations: CNS – central nervous system, PNET – primitive neuroectodermal tumor, AML – acute myeloid leukemia, RR – relative risks, EMR – excess mortality ratios, CI – confidence intervals, NE – not estimable

| <b>Overall Cardiac Mortality</b>        |                   |                    |
|-----------------------------------------|-------------------|--------------------|
|                                         | <b>RR (95%CI)</b> | <b>EMR (95%CI)</b> |
| <b>Sex</b>                              |                   |                    |
| Male                                    | 1 (ref)           | 1 (ref)            |
| Female                                  | 2.4 (1.6,3.7)     | 1.1 (0.7,1.9)      |
| <i>Pheterogeneity</i>                   | <0.0001           | 0.5805             |
| <b>First Primary Neoplasm Diagnosis</b> |                   |                    |
| CNS (excluding PNET)                    | 1 (ref)           | 1 (ref)            |
| CNS PNET                                | 0.4 (0.1,2.9)     | 0.4 (0.0,6.6)      |
| Leukemia (excluding AML)                | 0.6 (0.3,1.2)     | 0.7 (0.3,1.7)      |
| AML                                     | 4.9 (2.2,11.1)    | 6.7 (2.5,17.9)     |
| Hodgkin Lymphoma                        | 2.2 (1.1,4.4)     | 3.3 (1.3,8.3)      |
| Non-Hodgkin Lymphoma                    | 2.0 (0.9,4.5)     | 3.1 (1.2,8.4)      |
| Neuroblastoma                           | 0.3 (0.0,2.4)     | 0.4 (0.0,3.6)      |
| Non-Heritable Retinoblastoma            | 0.3 (0.0,2.6)     | 0.4 (0.0,4.7)      |
| Heritable Retinoblastoma                | NA                | NA                 |
| Wilms                                   | 1.2 (0.5,2.7)     | 1.4 (0.5,3.9)      |
| Bone Sarcoma                            | 1.8 (0.7,4.6)     | 2.5 (0.7,8.4)      |
| Soft Tissue Sarcoma                     | 1.2 (0.5,3.0)     | 1.6 (0.5,4.8)      |
| Other                                   | 0.8 (0.3,2.0)     | 0.7 (0.2,2.9)      |
| <i>Pheterogeneity</i>                   | 0.0002            | 0.0001             |
| <b>Age at Diagnosis</b>                 |                   |                    |
| 0-4 years                               | 1 (ref)           | 1 (ref)            |
| 5-9 years                               | 0.6 (0.4,1.1)     | 0.7 (0.4,1.2)      |
| 10-14 years                             | 0.5 (0.3,0.9)     | 0.5 (0.2,0.9)      |
| <i>Ptrend</i>                           | 0.0216            | 0.0312             |
| <b>Treatment Era</b>                    |                   |                    |
| 1970-1974                               | 1 (ref)           | 1 (ref)            |
| 1975-1979                               | 1.6 (0.9,2.9)     | 1.8 (0.8,4.2)      |
| 1980-1984                               | 1.9 (1.0,3.5)     | 2.1 (0.9,4.8)      |
| 1985-1989                               | 1.8 (0.9,3.7)     | 1.9 (0.7,4.6)      |
| 1990-1994                               | 0.9 (0.4,2.4)     | 0.8 (0.3,2.7)      |
| 1995-1999                               | 0.6 (0.2,2.1)     | 0.4 (0.1,2.4)      |
| <i>Ptrend</i>                           | 0.7687            | 0.3521             |
| <i>Pquadratic</i>                       | 0.0024            | 0.0019             |
| <b>Attained Age</b>                     |                   |                    |
| 5-19 years                              | 1 (ref)           | 1 (ref)            |
| 20-29 years                             | 0.8 (0.4,1.4)     | 1.8 (0.9,3.7)      |
| 30-39 years                             | 0.5 (0.2,0.9)     | 3.0 (1.4,6.3)      |
| 40-49 years                             | 0.3 (0.2,0.8)     | 4.9 (1.8,13.5)     |
| 50+ years                               | 0.3 (0.1,1.4)     | 15.8 (2.5,101.2)   |
| <i>Ptrend</i>                           | 0.0068            | 0.0004             |

**Supplemental Table 6:** Relative risks and excess mortality ratios per 10,000 person-years estimated using a multivariable model, adjusting for sex, first primary neoplasm type, age at diagnosis, treatment era, and attained age. For these analyses, the British Childhood Cancer Survivor Study was restricted to the diagnosis period to 1970-1999 in order to compare with the Childhood Cancer Survivor Study.

Abbreviations: CNS – central nervous system, PNET – primitive neuroectodermal tumor, AML – acute myeloid leukemia, RR – relative risks, EMR – excess mortality ratios, CI – confidence interval, NA – not applicable



## Cumulative Cardiac Mortality

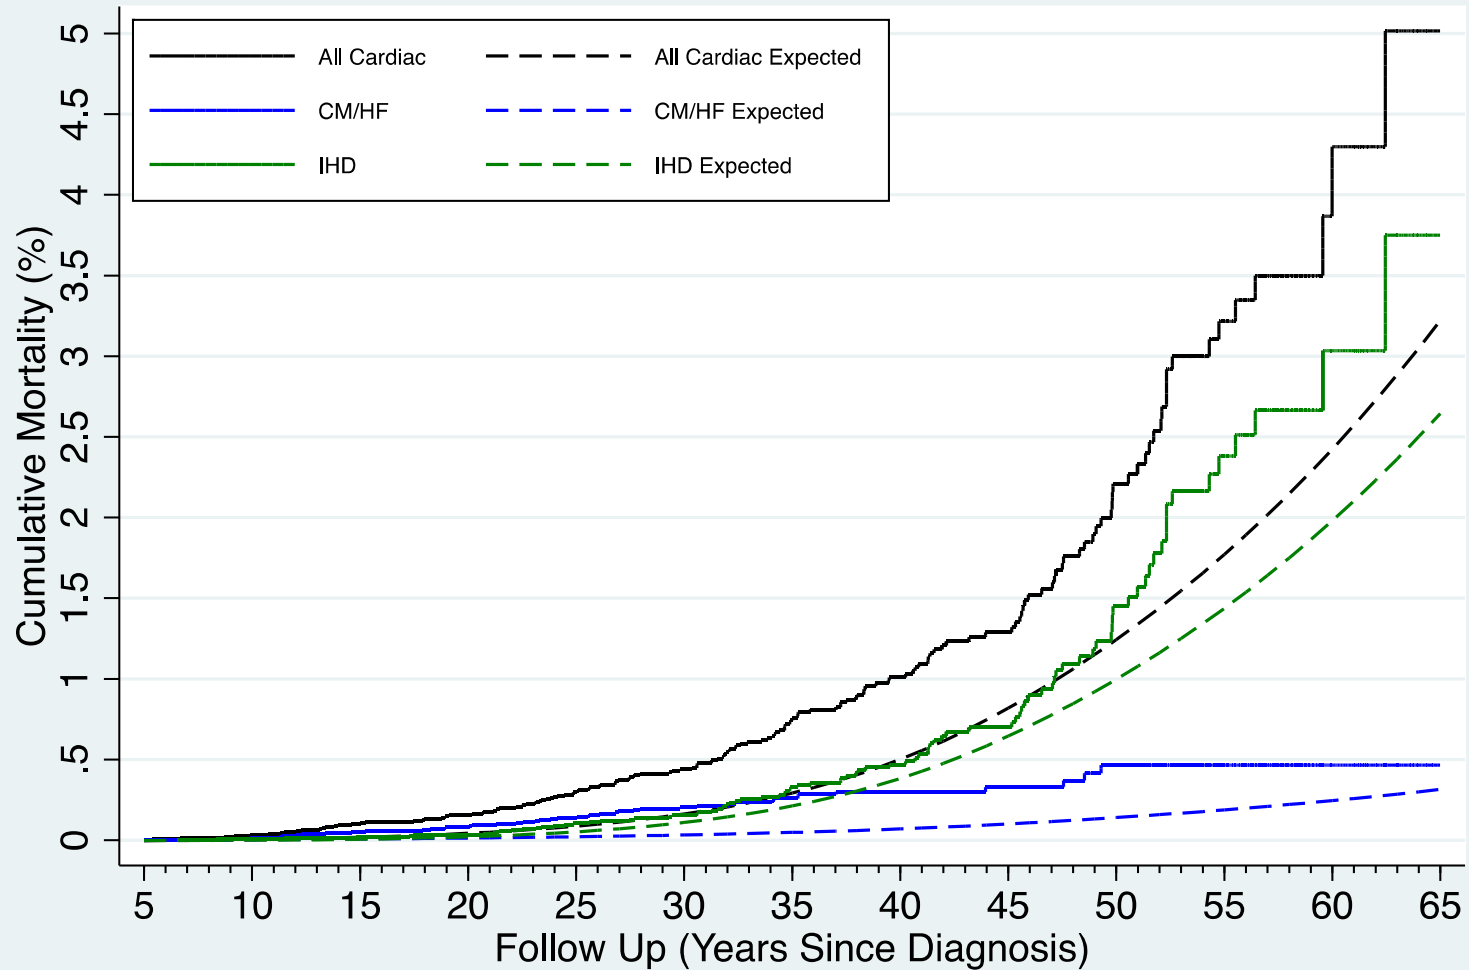

**Supplemental Figure 1:** Cumulative mortality of all cardiac causes, ischemic heart disease causes, and cardiomyopathy/heart failure causes among childhood cancer survivors compared to that expected in the general population, by follow-up (years since diagnosis).  
Abbreviations: CM/HF – cardiomyopathy/heart failure, IHD – ischemic heart disease
